# Supplementary material for: A Comprehensive Assessment of the Effects of Transgenic Cry1Ac/Cry1Ab Rice Huahui 1 on Adult Micraspis discolor (Fabricius) (Coleoptera: Coccinellidae)
Source: PLoS One. 2016 Feb 25;11(2):e0142714. doi: 10.1371/journal.pone.0142714 (PMC4767879; doi:10.1371/journal.pone.0142714)
Supplement: S2 File — (XLS) [file pone.0142714.s002.xls]

## Sheet: Sheet1
S2 file. Impact of the consumption of pollen from Cry1Ab /Cry1Ac Bt rice or the corresponding non-transformed rice plant on different life-table parameters of adult Micraspis discolor(Table 1)																								data of table 1				data of table 1				data of table 1				data of table 1
	pollen Preoviposit. period				pollen Fecundity				female Dry Weight			male Dry Weight													pollen Preoviposit. period				pollen Fecundity				female Dry Weight			male Dry Weight
MH63	9			MH63	7			MH63	7.2		MH63	3.6												MH63	9			MH63	7			MH63	7.2		MH63	3.6
MH63	10			MH63	29			MH63	6.3		MH63	4.2												MH63	10			MH63	29			MH63	6.3		MH63	4.2
MH63	10			MH63	20			MH63	6		MH63	3.6												MH63	10			MH63	20			MH63	6		MH63	3.6
MH63	10			MH63	30			MH63	6		MH63	3.1												MH63	10			MH63	30			MH63	6		MH63	3.1
MH63	11			MH63	17			MH63	6.6		MH63	4.1												MH63	11			MH63	17			MH63	6.6		MH63	4.1
MH63	11			MH63	35			MH63	5.5		MH63	4.8												MH63	11			MH63	35			MH63	5.5		MH63	4.8
MH63	11			MH63	25			MH63	5.4		MH63	4.2												MH63	11			MH63	25			MH63	5.4		MH63	4.2
MH63	12			MH63	26			MH63	4.9		MH63	3												MH63	12			MH63	26			MH63	4.9		MH63	3
MH63	12			MH63	29			MH63	7.2		MH63	3.5												MH63	12			MH63	29			MH63	7.2		MH63	3.5
MH63	12			MH63	11			MH63	6.6		MH63	4.3												MH63	12			MH63	11			MH63	6.6		MH63	4.3
MH63	13			MH63	19			MH63	6.1		MH63	3.6												MH63	13			MH63	19			MH63	6.1		MH63	3.6
MH63	13			MH63	43			MH63	6		MH63	4.2												MH63	13			MH63	43			MH63	6		MH63	4.2
MH63	13			MH63	28			MH63	5.3		MH63	3												MH63	13			MH63	28			MH63	5.3		MH63	3
MH63	13			MH63	12			MH63	6		MH63	4.2												MH63	13			MH63	12			MH63	6		MH63	4.2
MH63	13			MH63	12			MH63	5.4		MH63	3.6												MH63	13			MH63	12			MH63	5.4		MH63	3.6
MH63	13			MH63	21			MH63	6.6		MH63	4.8												MH63	13			MH63	21			MH63	6.6		MH63	4.8
MH63	13			MH63	18			HH1	7.2		MH63	4.3												MH63	13			MH63	18			HH1	7.2		MH63	4.3
MH63	13			MH63	25			HH1	6.6		HH1	3.6												MH63	13			MH63	25			HH1	6.6		HH1	3.6
MH63	14			MH63	20			HH1	6.1		HH1	4.2												MH63	14			MH63	20			HH1	6.1		HH1	4.2
MH63	14			MH63	13			HH1	5.3		HH1	3												MH63	14			MH63	13			HH1	5.3		HH1	3
MH63	14			MH63	7			HH1	6.6		HH1	4.1												MH63	14			MH63	7			HH1	6.6		HH1	4.1
MH63	14			MH63	19			HH1	5.4		HH1	4.2												MH63	14			MH63	19			HH1	5.4		HH1	4.2
MH63	14			MH63	16			HH1	4.8		HH1	3.7												MH63	14			MH63	16			HH1	4.8		HH1	3.7
MH63	14			MH63	17			HH1	6.7		HH1	4.1												MH63	14			MH63	17			HH1	6.7		HH1	4.1
MH63	15			MH63	13			HH1	6		HH1	3.7												MH63	15			MH63	13			HH1	6		HH1	3.7
MH63	15			MH63	25			HH1	6.5		HH1	4.2												MH63	15			MH63	25			HH1	6.5		HH1	4.2
MH63	15			MH63	20			HH1	6.6		HH1	4.2												MH63	15			MH63	20			HH1	6.6		HH1	4.2
MH63	15			MH63	9			HH1	7.2		HH1	3.5												MH63	15			MH63	9			HH1	7.2		HH1	3.5
MH63	16			MH63	11			HH1	6		HH1	4.2												MH63	16			MH63	11			HH1	6		HH1	4.2
MH63	16			MH63	16			HH1	5.4		HH1	3												MH63	16			MH63	16			HH1	5.4		HH1	3
HH1	9			HH1	18			HH1	6		HH1	3.3												HH1	9			HH1	18			HH1	6		HH1	3.3
HH1	10			HH1	21			HH1	6.6		HH1	4.2												HH1	10			HH1	21			HH1	6.6		HH1	4.2
HH1	10			HH1	30			HH1	6.3		HH1	3.6												HH1	10			HH1	30			HH1	6.3		HH1	3.6
HH1	10			HH1	23						HH1	3.6												HH1	10			HH1	23						HH1	3.6
HH1	11			HH1	23																			HH1	11			HH1	23
HH1	11			HH1	28																			HH1	11			HH1	28
HH1	11			HH1	19																			HH1	11			HH1	19
HH1	11			HH1	28																			HH1	11			HH1	28
HH1	12			HH1	37																			HH1	12			HH1	37
HH1	12			HH1	30																			HH1	12			HH1	30
HH1	12			HH1	24																			HH1	12			HH1	24
HH1	12			HH1	26																			HH1	12			HH1	26
HH1	13			HH1	25																			HH1	13			HH1	25
HH1	13			HH1	13																			HH1	13			HH1	13
HH1	13			HH1	17																			HH1	13			HH1	17
HH1	13			HH1	19																			HH1	13			HH1	19
HH1	13			HH1	18																			HH1	13			HH1	18
HH1	13			HH1	12																			HH1	13			HH1	12
HH1	14			HH1	23																			HH1	14			HH1	23
HH1	14			HH1	16																			HH1	14			HH1	16
HH1	14			HH1	5																			HH1	14			HH1	5
HH1	14			HH1	35																			HH1	14			HH1	35
HH1	14			HH1	10																			HH1	14			HH1	10
HH1	14			HH1	7																			HH1	14			HH1	7
HH1	15			HH1	12																			HH1	15			HH1	12
HH1	16			HH1	8																			HH1	16			HH1	8
HH1	16			HH1	15																			HH1	16			HH1	15
HH1	17			HH1	14																			HH1	17			HH1	14
HH1	17			HH1	12																			HH1	17			HH1	12
HH1	17			HH1	10																			HH1	17			HH1	10
